# Supplementary material
Source: PubMed Central journal article supplement (PMC2829158)

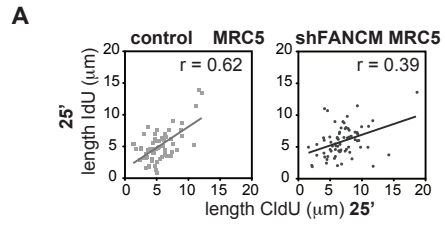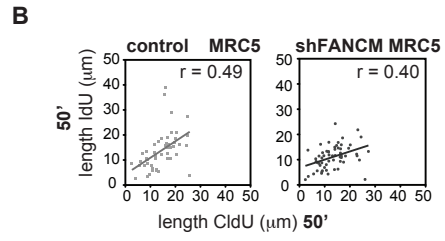

Supplement: emboj2009371s2.pdf [file emboj2009371s2.pdf]

**A**

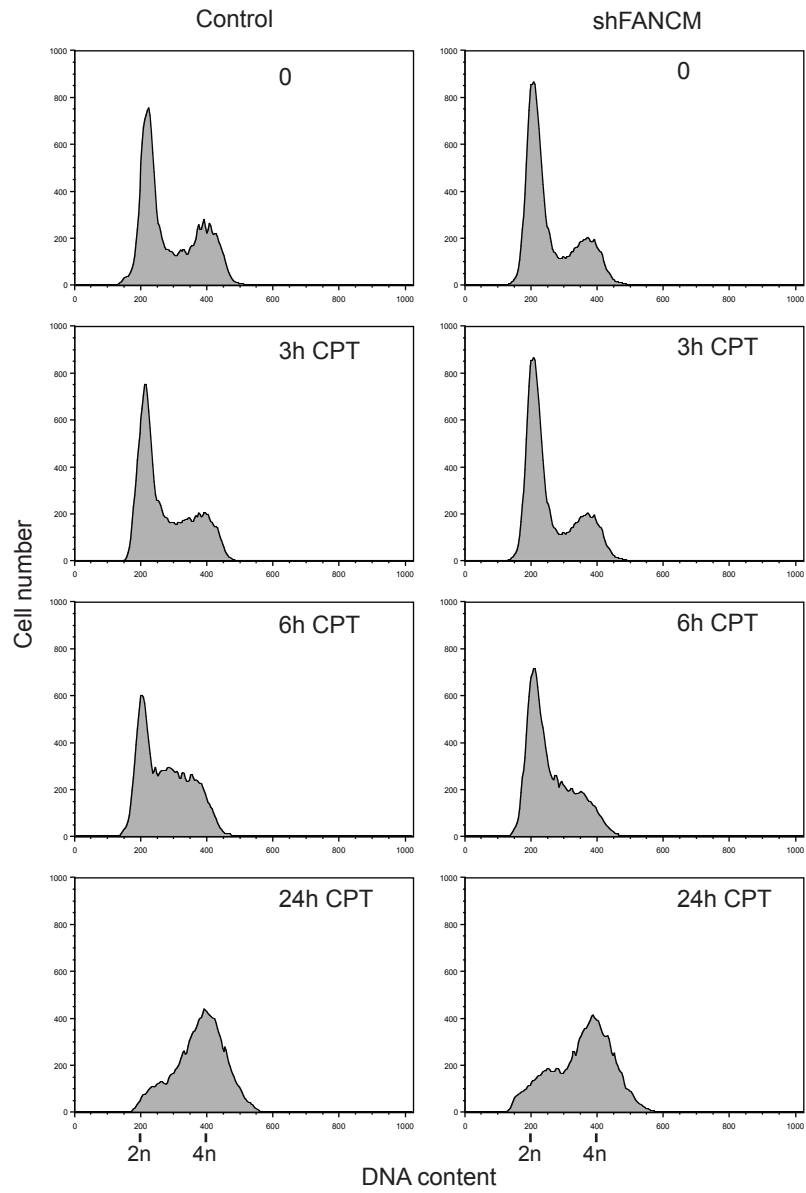

**B**

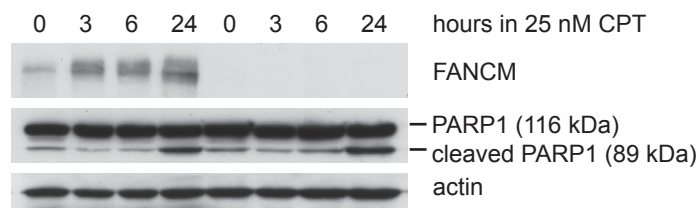

Supplement: emboj2009371s5.pdf [file emboj2009371s5.pdf]

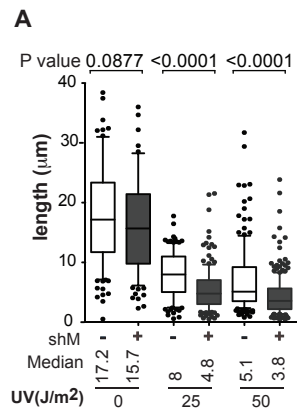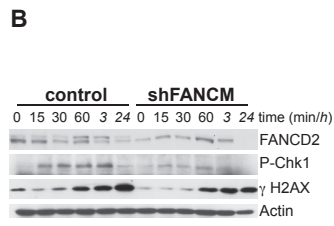

Supplement: emboj2009371s6.pdf [file emboj2009371s6.pdf]
